# Supplementary material for: Human Leukemic Cells performing Oxidative Phosphorylation (OXPHOS) Generate an Antioxidant Response Independently of Reactive Oxygen species (ROS) Production
Source: PubMed Central journal article supplement — eBioMedicine. 2015 Nov 26;3:43–53. doi: 10.1016/j.ebiom.2015.11.045 (PMC4739420; doi:10.1016/j.ebiom.2015.11.045), 2015-11-26
Supplement: mmc1.pdf [file mmc1.pdf]

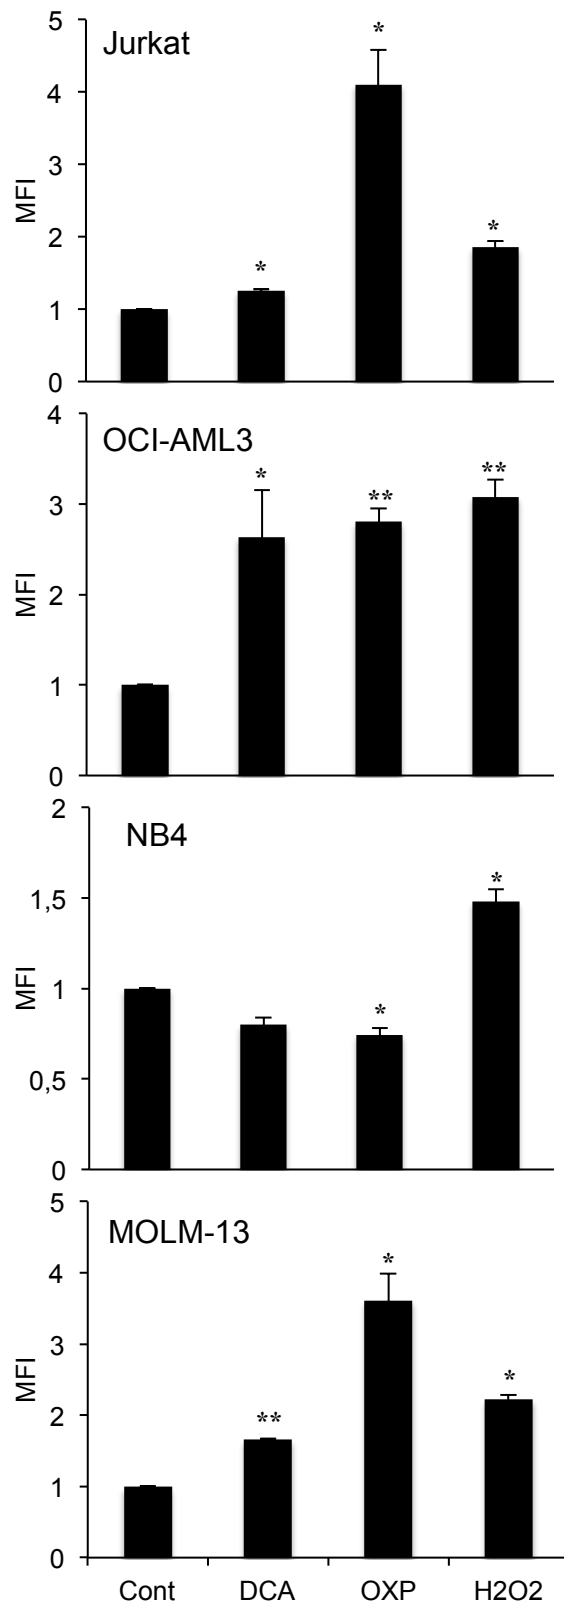

**Supplemental Figure 1A.** Mean Fluorescence Intensity of ROS production was calculated for different cell lines under various treatments

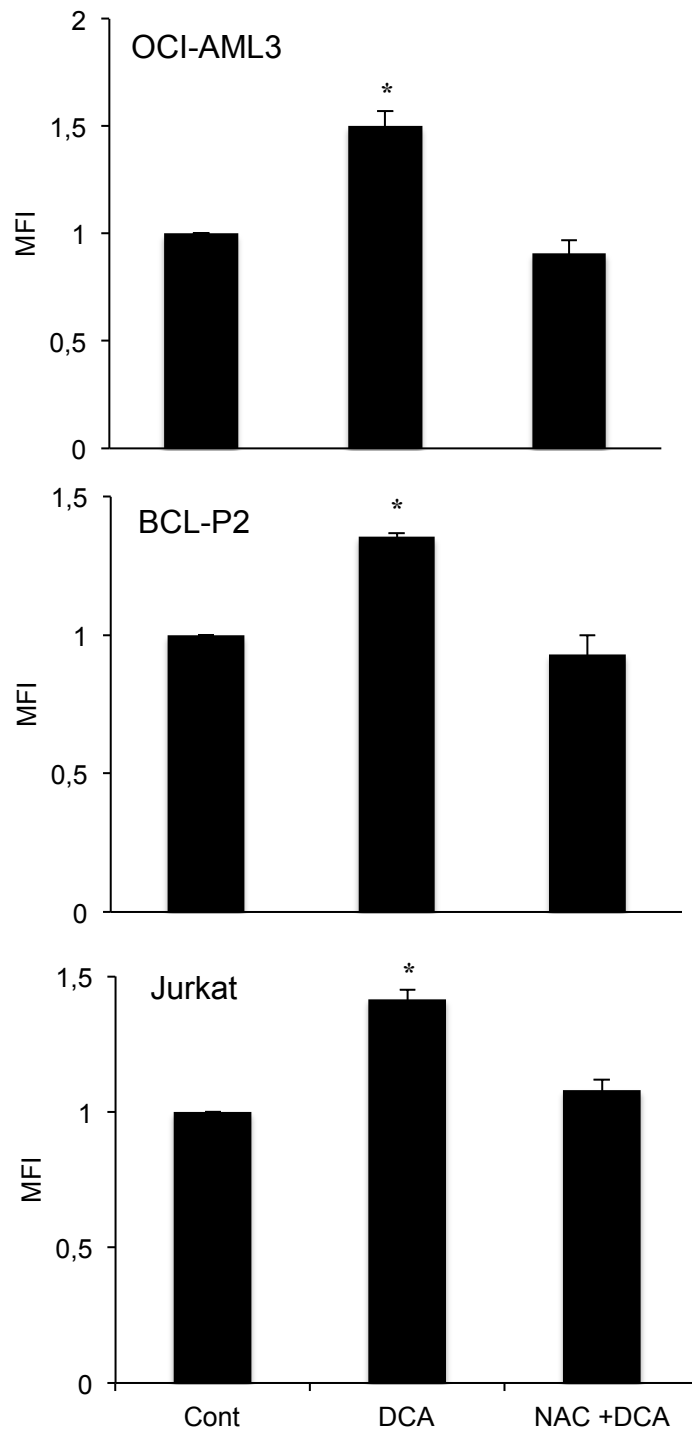

**Supplemental Figure 1B.** Mean Fluorescence Intensity of ROS production was calculated for different cell lines under various treatments

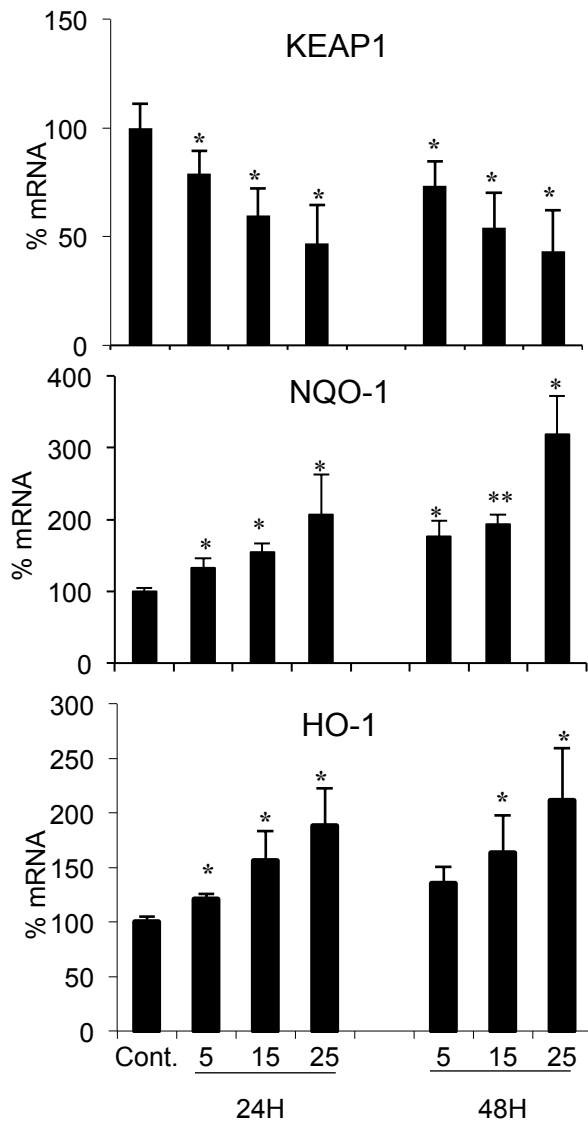

**Supplemental Figure 2.** Jurkat cells were treated with different concentrations of DCA for different times and mRNA expression was analyzed as described in Fig. 2.

# Jurkat Cells

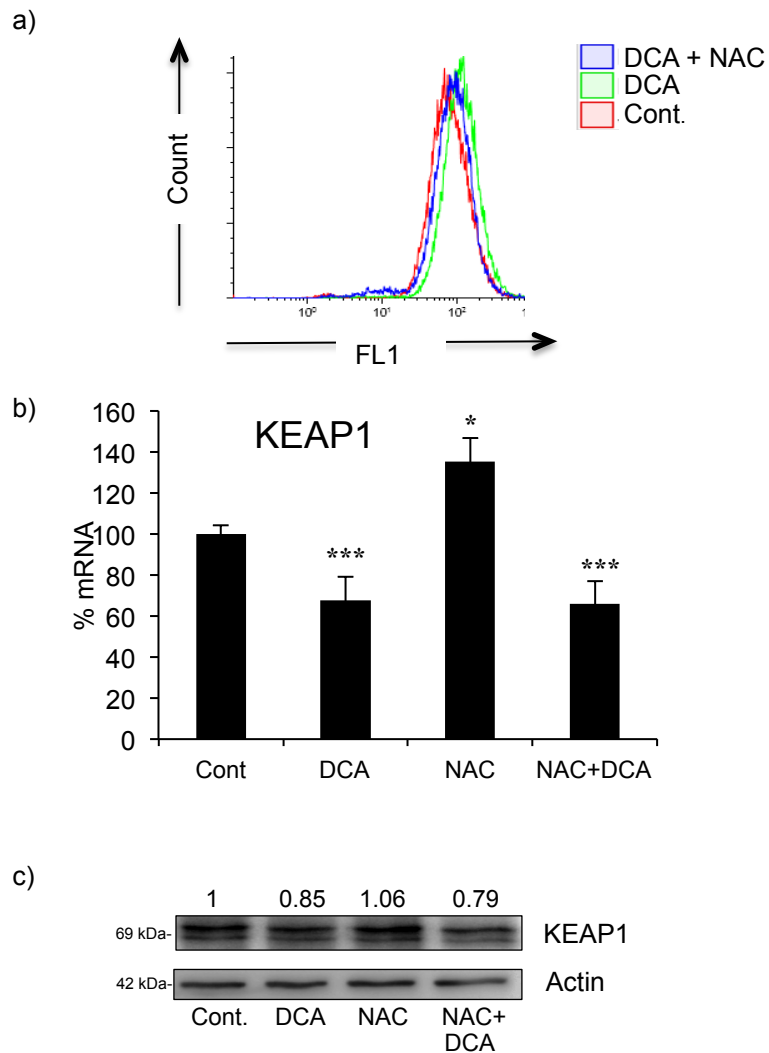

**Supplemental Figure 3.** Jurkat cells were treated with 1.5mM NAC 1 h before adding DCA (20 mM) for 24 h. Cells were labeled with CH-H2DCFDA and analyzed by FACs for ROS production. Keap1 mRNA and protein were analyzed as described in Fig. 4.
